# Supplementary material for: Targeting Mechanics-Induced Fibroblast Activation through CD44-RhoA-YAP Pathway Ameliorates Crystalline Silica-Induced Silicosis
Source: PubMed Central journal article supplement (PMC6691376; doi:10.7150/thno.35665), 2019-07-09
Supplement: thnov09p4993s1.pdf [file thnov09p4993s1.pdf]

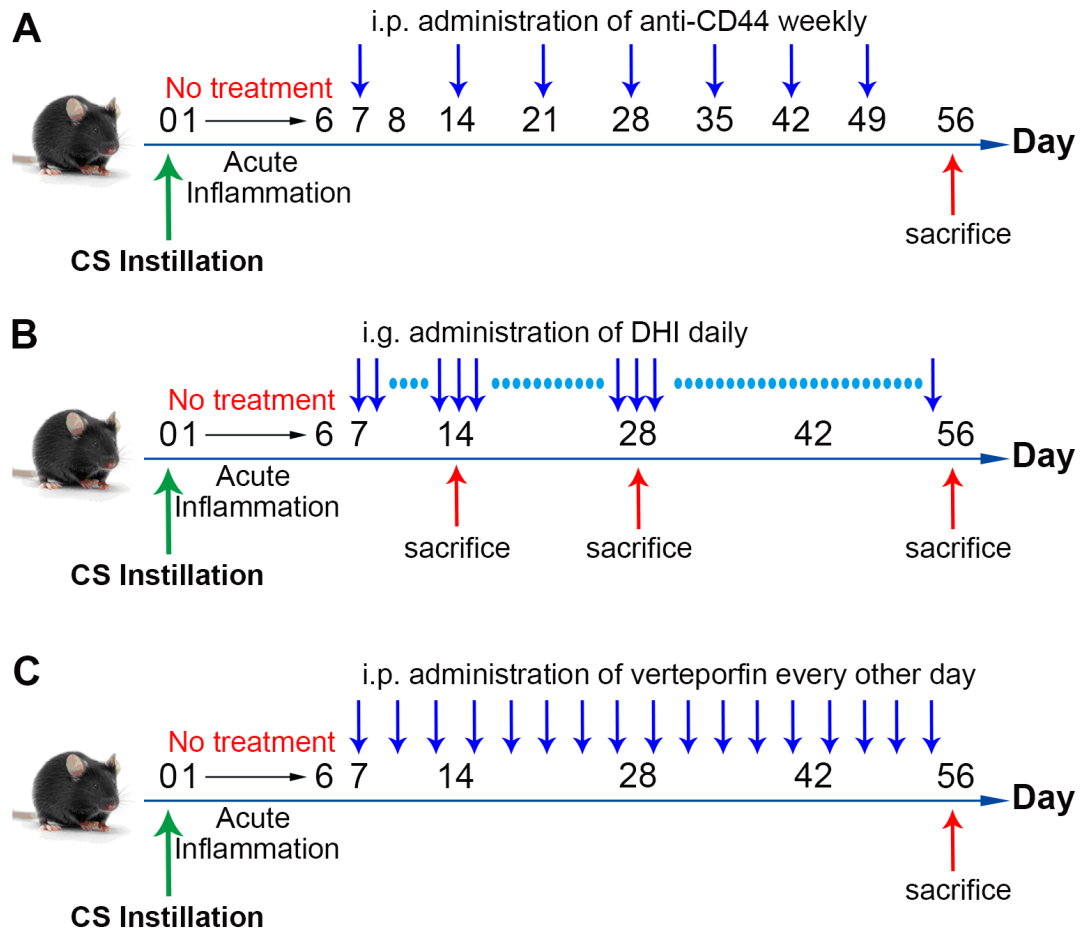

**Supplementary figure 1.** (A) Male C57BL/6 mice received weekly intraperitoneal injection of anti-CD44 or isotype-matched control antibody (300  $\mu$ g in 500  $\mu$ l saline). (B) Male C57BL/6 mice received daily intragastrical administration of gradient-dose DHI or vehicle. (C) Male C57BL/6 mice received intraperitoneal injection of verteporfin or vehicle every other day. (A-C) All treatments were beginning at day 7 after CS instillation (n=10 per group).

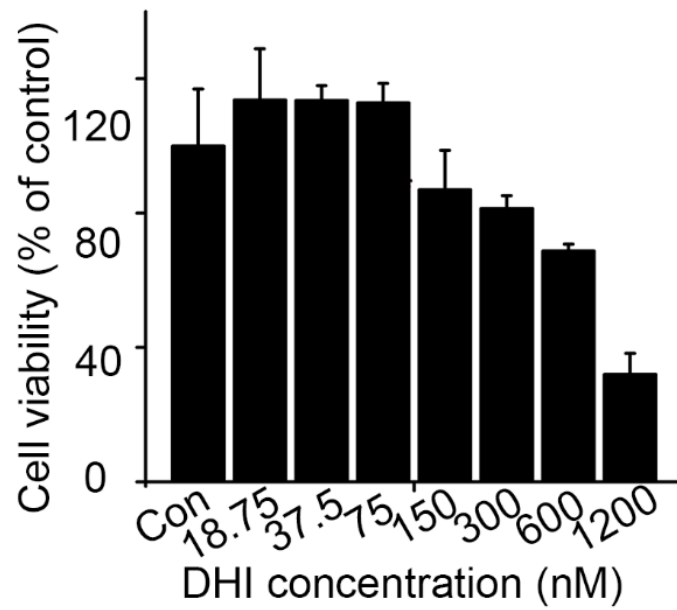

**Supplementary figure 2.** Viability of NIH-3T3 fibroblasts incubated with different concentrations of DHI was detected by the MTT assay (n=3; \*, P < 0.05).

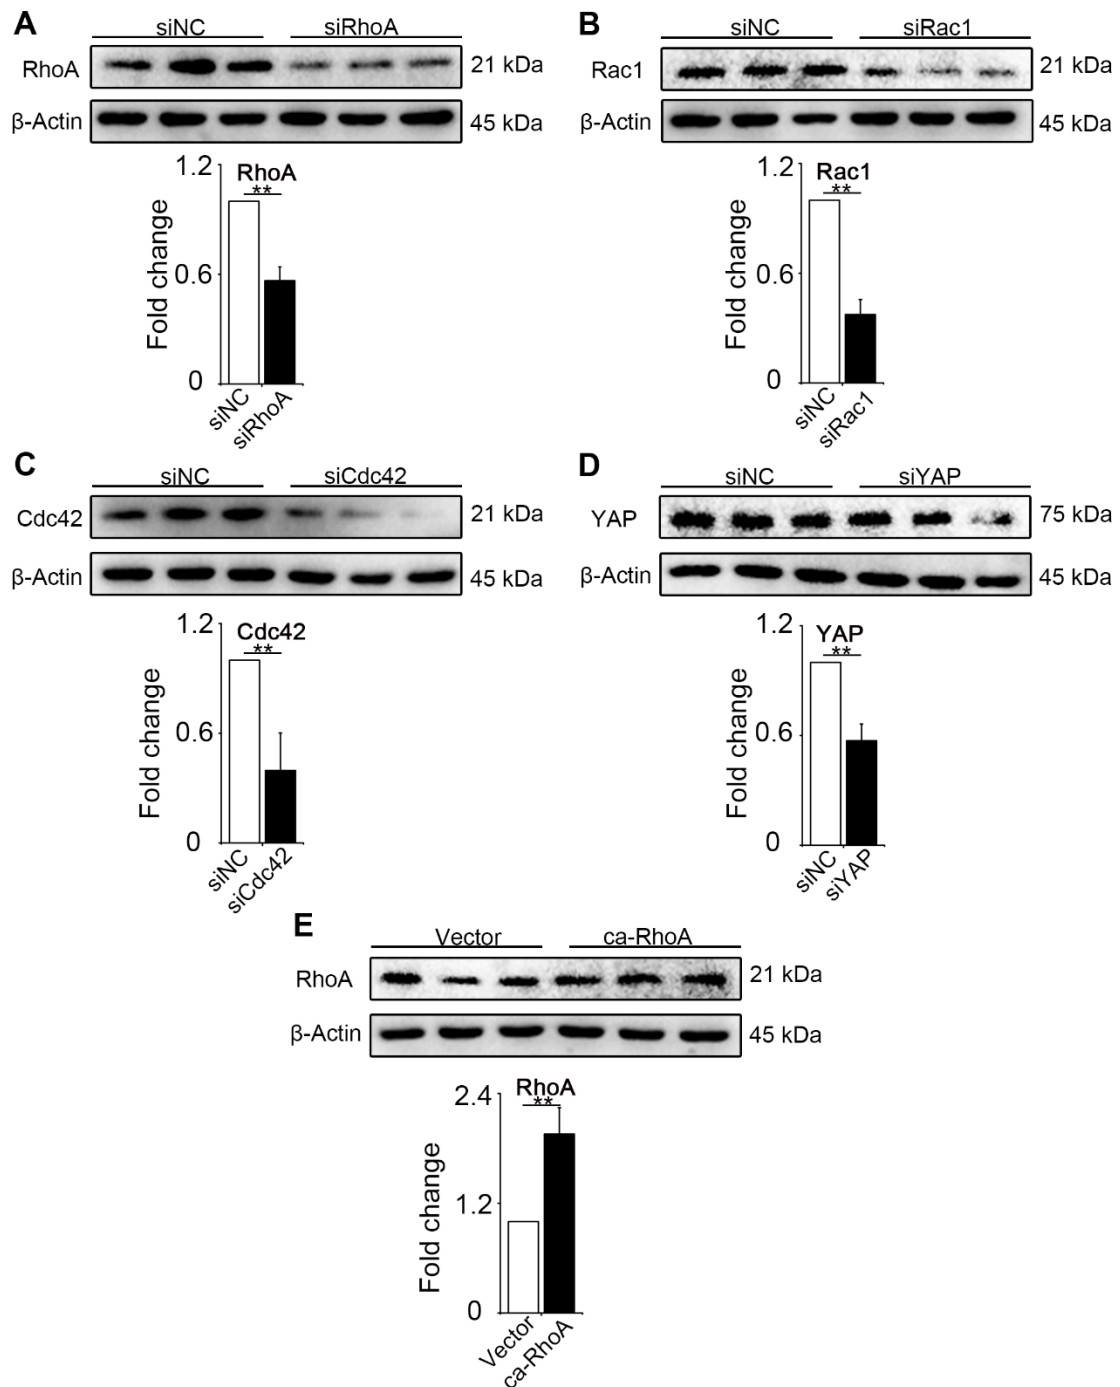

**Supplementary figure 3.** (A-E) Western blot analysis of RhoA (A), Rac1 (B), Cdc42 (C), YAP (D) siRNA and ca-RhoA (E) plasmid transfection efficiency.  $\beta$ -Actin was used as a loading control. Data shown are representative of three independent experiments. Error bars indicate mean  $\pm$  SD ( $**$ ,  $P < 0.01$ ).

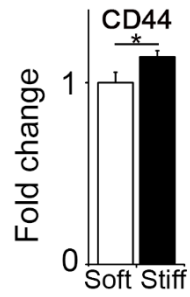

**Supplementary figure 4.** NIH-3T3 fibroblasts were cultured on soft (1 kPa) or stiff (60 kPa) gel-coated coverslips and qPCR analysis of *Cd44* mRNA level was performed. Data shown are representative of three independent experiments. Error bars indicate mean  $\pm$  SD (\*,  $P < 0.05$ ).

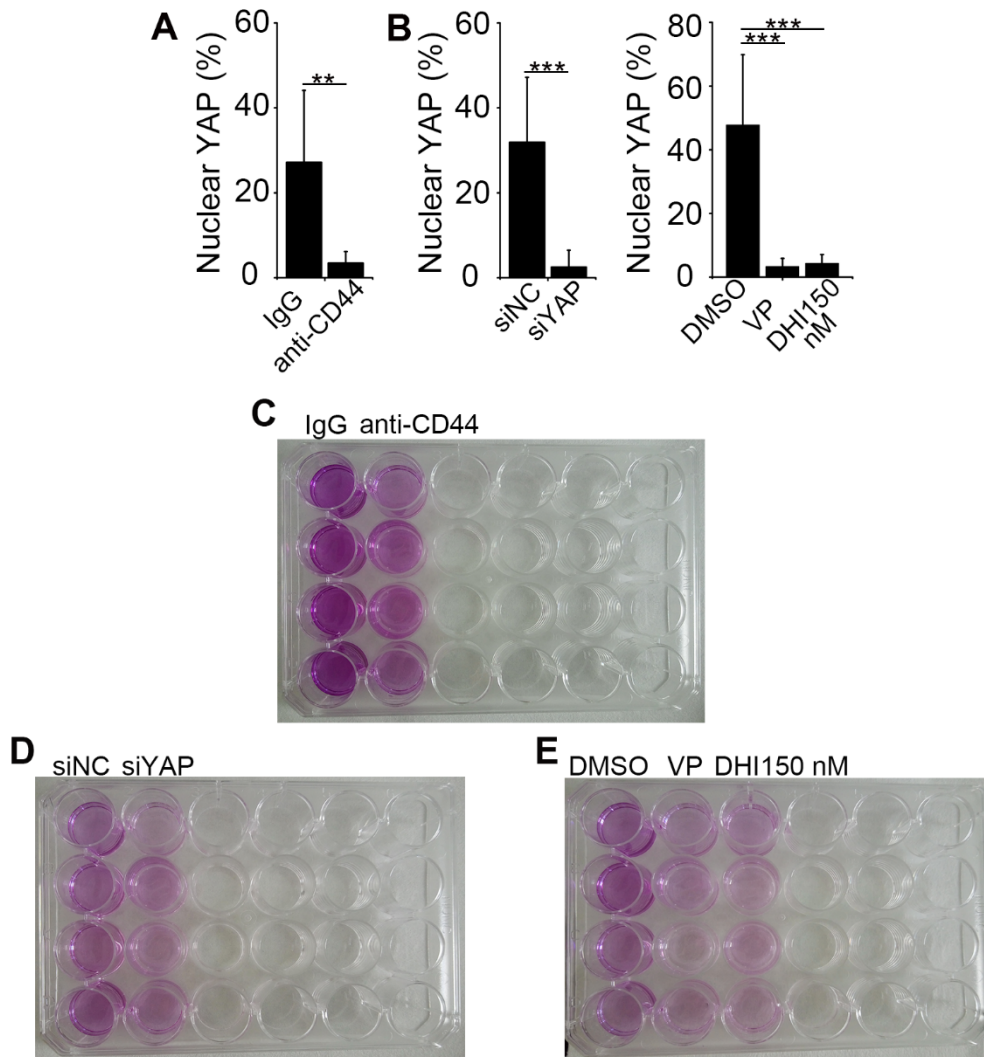

**Supplementary figure 5.** NIH-3T3 fibroblasts were cultured on stiff (60 kPa) gel-coated coverslips treated with anti-CD44 antibody (IM7) 10  $\mu$ g/mL for 12 hours, YAP siRNA for 48 hours, 250 nM VP or 150 nM DHI for 12 hours. **(A-B)** NIH-3T3 cells were immunostained with an antibody recognizing YAP. The percentage of cells with predominantly nuclear YAP staining was quantified (n=3; \*\*, P < 0.01; \*\*\*, P < 0.001). **(C-E)** Example images about Transwell migration assay in the different treated fibroblasts as described in figure 4E were shown.

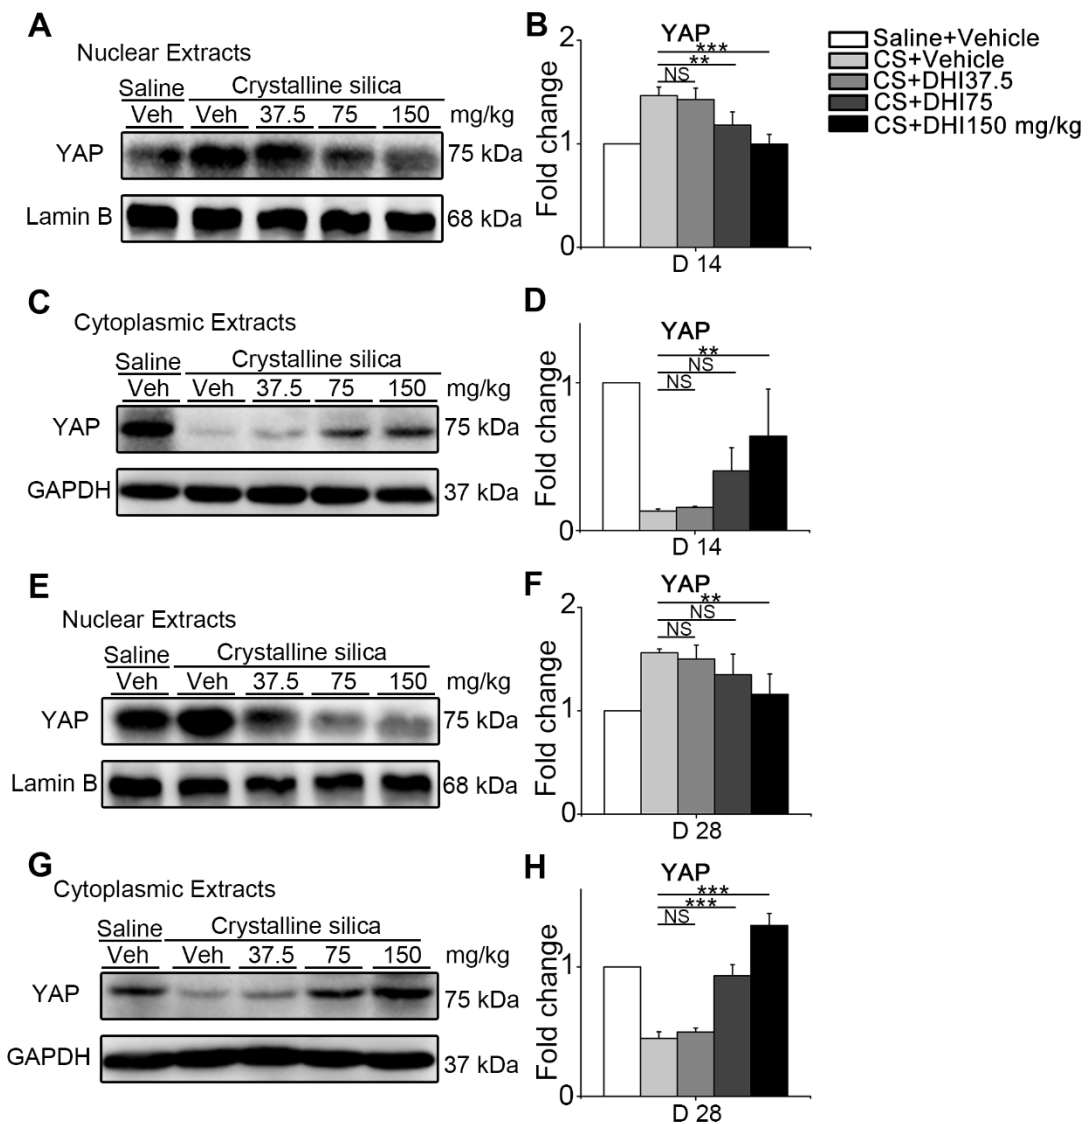

**Supplementary figure 6.** (A-D) Western blot analysis of nuclear extracts (A-B) and cytoplasmic extracts (C-D) from whole lung lysates at day 14 following gradient-dose DHI treatments of mice. Analysis of YAP expression. (E-H) Western blot analysis of nuclear extracts (E-F) and cytoplasmic extracts (G-H) from whole lung lysates at day 28 following gradient-dose DHI treatments of mice. Analysis of YAP expression. (B, D, F, H) Data shown are representative of three independent experiments. Error bars indicate mean  $\pm$  SD (\*\*,  $P < 0.01$ ; \*\*\*,  $P < 0.001$ ; NS, not significant).

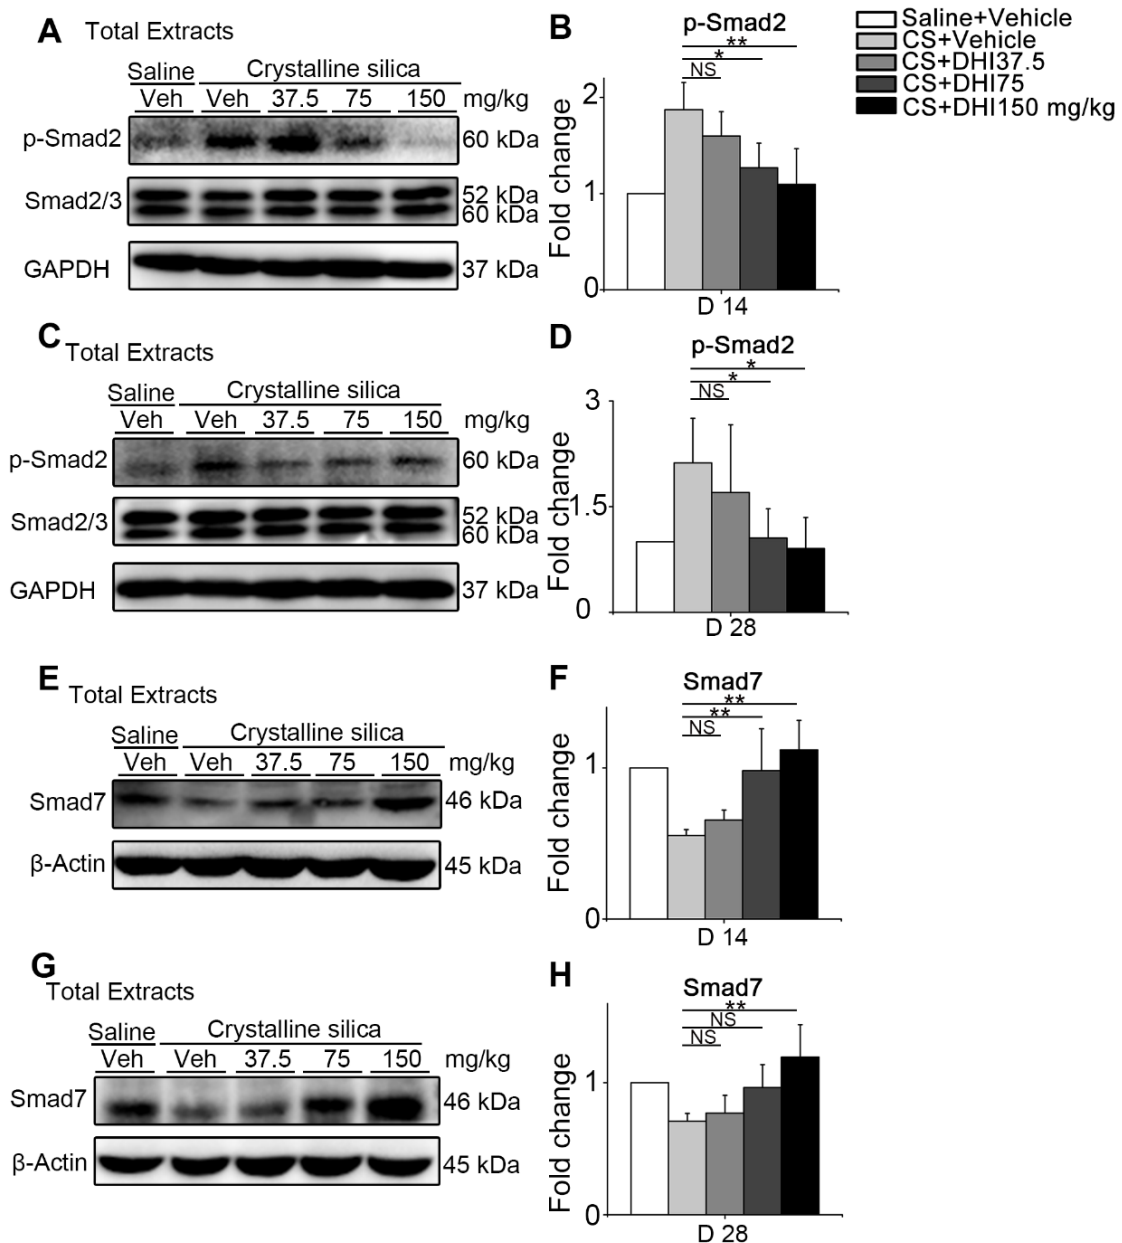

**Supplementary figure 7.** (A-D) Western blot analysis of total extracts from whole lung lysates at day 14 (A-B) or 28 (C-D) following gradient-dose DHI treatments of mice. Analysis of p-Smad2 and Smad2/3 expressions. (E-H) Western blot analysis of total extracts from whole lung lysates at day 14 (E-F) or 28 (G-H) following gradient-dose DHI treatments of mice. Analysis of Smad7 expression. (B, D, F, H) Data shown are representative of three independent experiments. Error bars indicate mean  $\pm$  SD (\*,  $P < 0.05$ ; \*\*,  $P < 0.01$ ; NS, not significant).

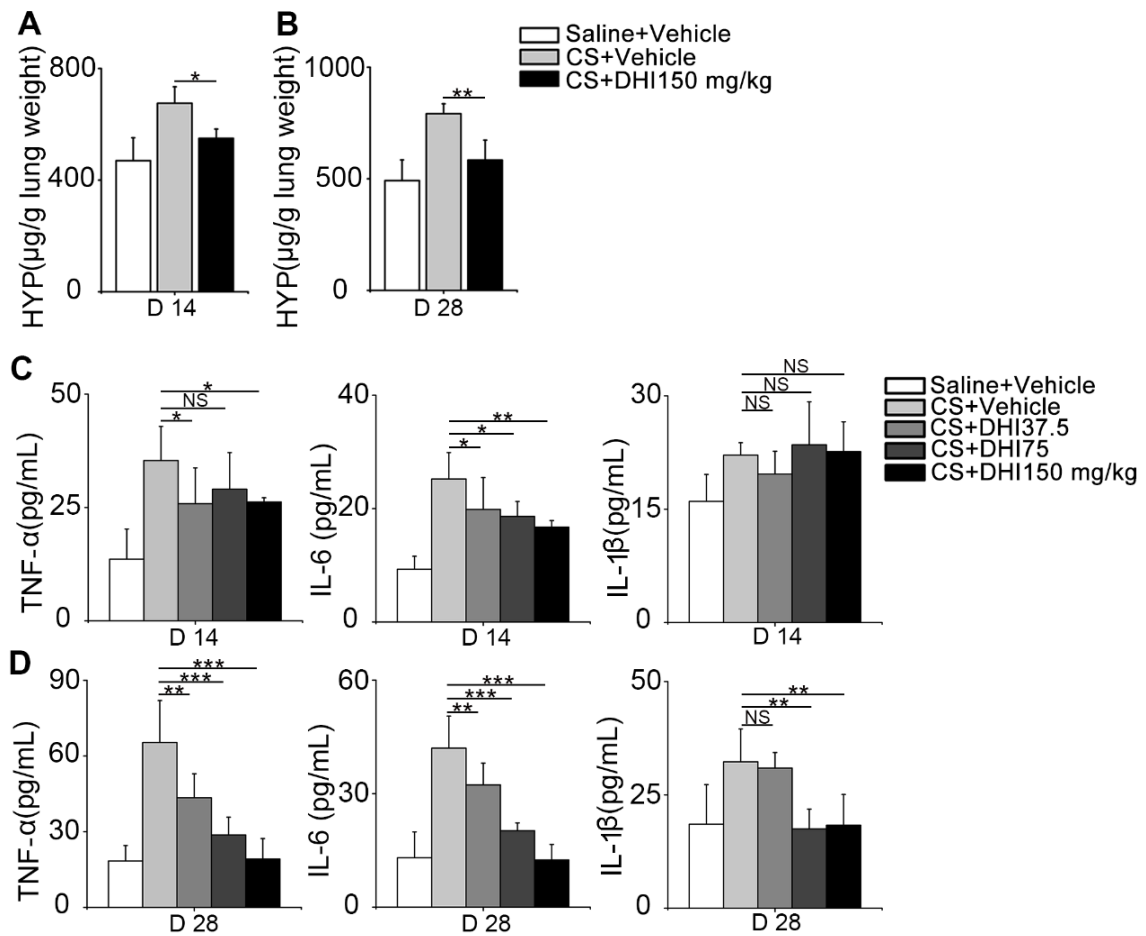

**Supplementary figure 8.** (A-B) Lungs of different treatments of mice were analyzed for hydroxyproline content at day 14 (A) and day 28 (B) (n=3 per group). Error bars indicate mean  $\pm$  SD (\*,  $P < 0.05$ ; \*\*,  $P < 0.01$ ). (C-D) ELISA analysis of TNF- $\alpha$ , IL-6 and IL-1 $\beta$  in BALF at day 14 (C) and day 28 (D) following gradient-dose DHI treatments of mice (n=5 per group). Error bars indicate mean  $\pm$  SD (\*,  $P < 0.05$ ; \*\*,  $P < 0.01$ ; \*\*\*,  $P < 0.001$ ; NS, not significant).



**Supplementary table 1. Primary antibodies used for western blot, immunofluorescence and immunohistochemistry.**

| <b>Antibody</b> | <b>Company</b>            | <b>Catalog #</b> | <b>Application</b> | <b>Dilution</b> |
|-----------------|---------------------------|------------------|--------------------|-----------------|
| YAP             | Cell Signaling Technology | #14074           | WB                 | 1:1000          |
| RhoA            | Cell Signaling Technology | #2117            | WB                 | 1:1000          |
| Rac             | Cell Signaling Technology | #2465            | WB                 | 1:1000          |
| Cdc42           | Cell Signaling Technology | #2466            | WB                 | 1:1000          |
| Mst 1           | Cell Signaling Technology | #3682            | WB                 | 1:1000          |
| Lats 1          | Cell Signaling Technology | #3477            | WB                 | 1:1000          |
| Phospho-Smad2   | Cell Signaling Technology | #3108            | WB                 | 1:1000          |
| Smad2/3         | Cell Signaling Technology | #8685            | WB                 | 1:1000          |
| Lamin B1        | Cell Signaling Technology | #13435           | WB                 | 1:1000          |
| GAPDH           | Cell Signaling Technology | #2118            | WB                 | 1:1000          |
| $\beta$ -Actin  | Cell Signaling Technology | #4970            | WB                 | 1:1000          |
| MMP2            | R&D systems               | AF1488           | WB                 | 0.1 ug/mL       |
| TIMP2           | R&D systems               | AF971            | WB                 | 1 ug/mL         |
| Smad7           | R&D systems               | MAB2029          | WB                 | 1 ug/mL         |
| Collagen 1      | Absin Bioscience          | abs131984        | WB                 | 1:500           |
| CD44            | Abcam                     | ab119348         | IF                 | 1:100           |
| YAP             | Santa Cruz                | sc-101199        | IF                 | 1:50            |
| $\alpha$ -SMA   | Abcam                     | ab32575          | IF                 | 1:1000          |
| YAP             | Cell Signaling Technology | #14074           | IHC                | 1:100           |
| Collagen 1      | Absin Bioscience          | abs131984        | IHC                | 1:100           |
| Fibronectin     | Novusbio                  | NBP1-91258ss     | IHC                | 1:200           |

WB: western blot; IF: immunofluorescence; IHC: immunohistochemistry;

**Supplementary table 2. Quantitative PCR primers for analysis.**

| <b>Gene</b>                    | <b>Primer forward</b>     | <b>Primer reverse</b>     |
|--------------------------------|---------------------------|---------------------------|
| <i>Gapdh</i>                   | AGGTCGGTGTGAACGGATTTG     | TGTAGACCATGTAGTTGAGGTCA   |
| <i>Tgf-<math>\beta</math>1</i> | CTCCCGTGGCTTCTAGTGC       | GCCTTAGTTTGGACAGGATCTG    |
| <i>Pai</i>                     | ACGGTGATGCGATATAATGTAAACG | CATTCCTGAGAAACACAGCATTG   |
| <i>Il-6</i>                    | CAACGATGATGCACTTGCAGA     | CTCCAGGTAGCTATGGTACTCCAGA |
| <i>Il-8</i>                    | TTCTTGTCTTTCAGCATGGC      | GAACGTGACCTCTTTCTCCC      |
| <i>Fibronectin</i>             | GCAGTGACCACCATTCTG        | GGTAGCCAGTGAGCTGAACAC     |
| <i>Collagen-1a1</i>            | GCTCCTCTTAGGGGCCACT       | CCACGTCTCACCATTGGGG       |
